# Supplementary material for: Towards A Novel Multi-Epitopes Chimeric Vaccine for Simulating Strong Immune Responses and Protection against Morganella morganii
Source: MDPI journal article supplement (doi:10.3390/ijerph182010961), 2021-10-19
Supplement: s1 [file s1]

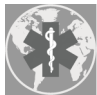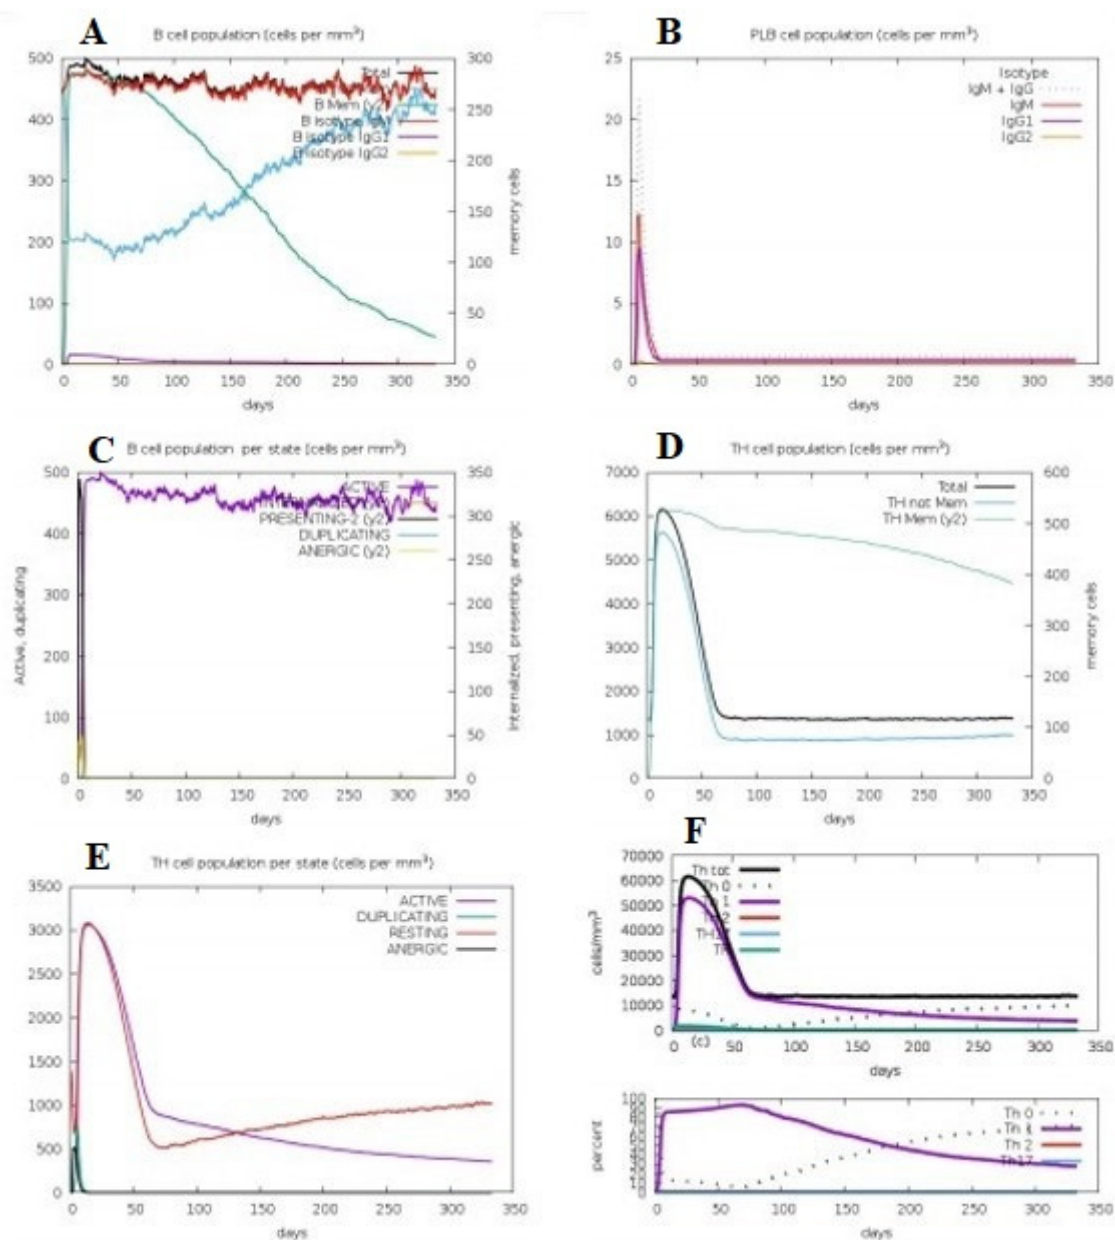

**Figure S1.** Different B and T-cell responses against the vaccine. A. B cell population (cells per mm<sup>3</sup>) versus days, B. lymphocytes B and deriving antibody-producing plasma cells (cells per mm<sup>3</sup>) versus days, C. B-cell population per state (cells per mm<sup>3</sup>) versus days, D. T-helper cell population (cells per mm<sup>3</sup>) versus days, E. T-helper cell population per state (cells per mm<sup>3</sup>) versus days and F. Different T-cell types cells per mm<sup>3</sup> and percentage) versus time.

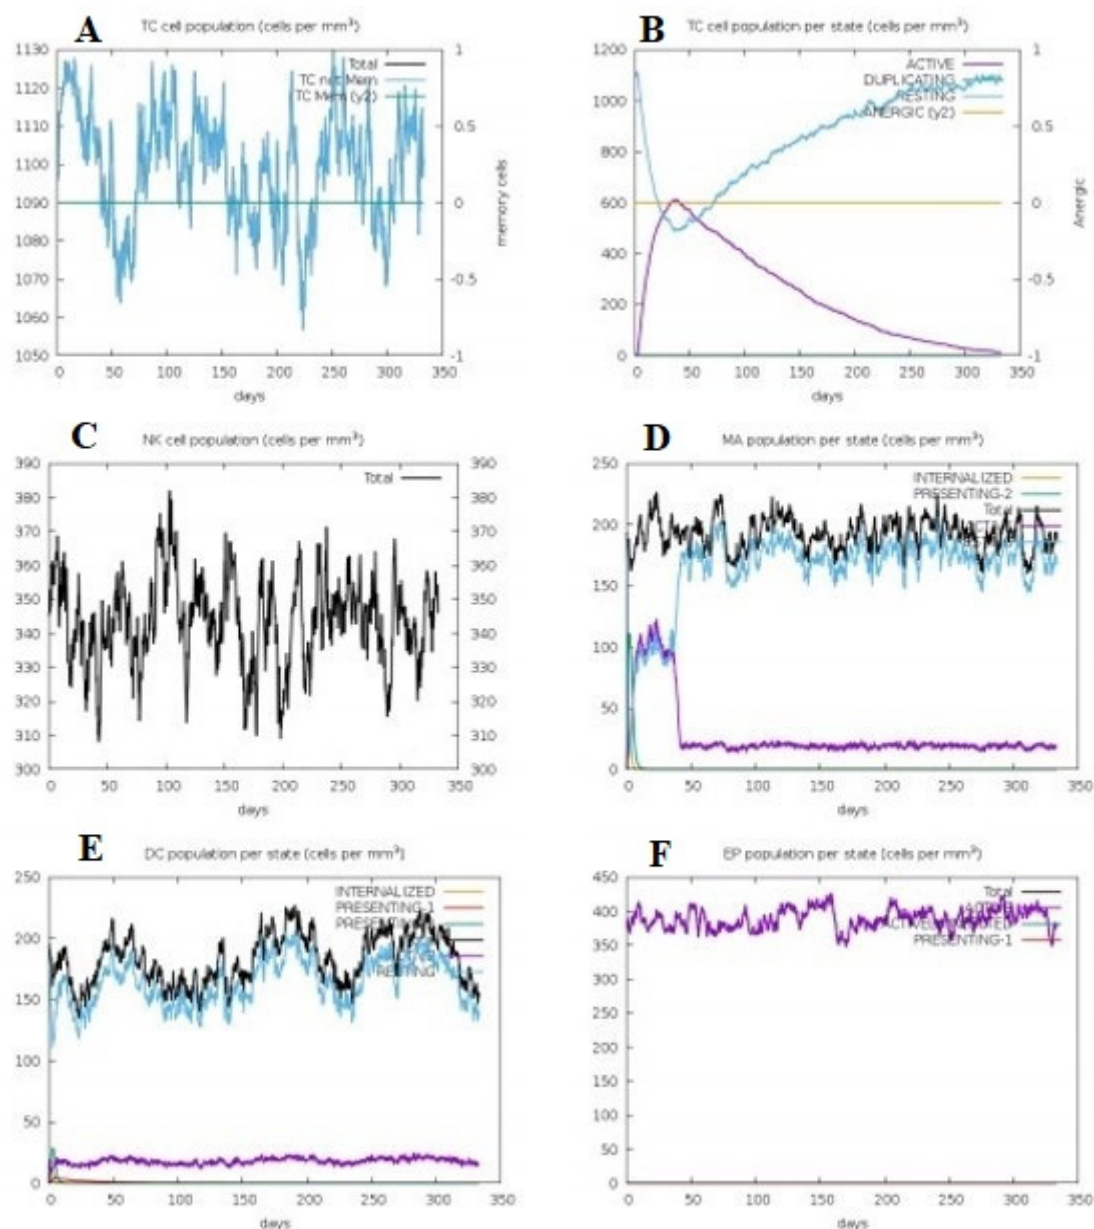

**Figure S2.** Different immune cell responses generated in response to the chimeric vaccine construct. A. Tc (cytotoxic killer T-cell) population (cells per  $\text{mm}^3$ ) versus days, B. Tc (cytotoxic killer T-cell) population per state (cells per  $\text{mm}^3$ ) versus days, C. NK (natural killer cell) population (cells per  $\text{mm}^3$ ) versus days, macrophages, D. MA (macrophages cell) population per state (cells per  $\text{mm}^3$ ) versus days, E. DC (dendritic cell) population per state (cells per  $\text{mm}^3$ ) versus days, F. EP (epithelial cell) population per state (cells per  $\text{mm}^3$ ) versus days.

**Table S1.** Antigenic exo-proteome, secretome and periplasmic proteins. Only proteins with cut-off value  $\geq 0.5$  were selected as antigenic and presented in the table.

| Vaccine Target             | Antigenicity        |
|----------------------------|---------------------|
| Outer Membrane             | (Threshold = > 0.5) |
| >core/202/1/Org1_Gene2008  | 0.7314              |
| >core/240/1/Org1_Gene2290  | 0.6489              |
| >core/305/1/Org1_Gene2928  | 0.7124              |
| >core/541/1/Org1_Gene2328  | 0.4457              |
| >core/2548/1/Org1_Gene579  | 0.7315              |
| >core/1233/2/Org2_Gene3569 | 0.7544              |
| Extracellular              |                     |
| >core/526/1/Org1_Gene577   | 0.6265              |

|                            |        |
|----------------------------|--------|
| >core/712/1/Org1_Gene1109  | 0.6174 |
| >core/1873/1/Org1_Gene1686 | 0.5652 |
| >core/3179/1/Org1_Gene2295 | 0.6933 |
| >core/3310/1/Org1_Gene3165 | 0.9094 |
| >core/3376/1/Org1_Gene2368 | 0.6135 |
| >core/3408/1/Org1_Gene142  | 0.5846 |
| >core/2155/2/Org2_Gene2207 | 0.68   |
| >core/760/4/Org4_Gene2156  | 0.698  |
| <b>Periplasmic</b>         |        |
| >core/1397/1/Org1_Gene578  | 0.6548 |
| >core/2526/1/Org1_Gene1685 | 0.6497 |
| >core/2605/1/Org1_Gene117  | 0.6158 |
| >core/2919/1/Org1_Gene1681 | 0.5879 |
| >core/3996/1/Org1_Gene1683 | 0.543  |
| >core/2720/2/Org2_Gene1342 | 0.6962 |

**Table S2.** B-cell epitopes predicted from antigenic proteins. The epitopes are variable in length and have bippedred linear epitope prediction score  $\geq 0.50$ . Epitopes with length  $< 9$  residues were not selected for further analysis.

| Protein                                                            | Predicted Epitopes                                         |
|--------------------------------------------------------------------|------------------------------------------------------------|
| >core/240/1/Org1_Gene2290<br>(TonB-dependent siderophore receptor) | SRSDSRQLDSI                                                |
|                                                                    | GQEEKQVEV                                                  |
|                                                                    | KSGFRNGSDHDEN                                              |
|                                                                    | YQRYGGWYDGGKREILIDNTQTGLQYSD                               |
|                                                                    | NSESDGKHGIDLKGDFAAVLGKGTAHNSDKLSDRIPGTR                    |
|                                                                    | QYSNSDLLGQDL                                               |
|                                                                    | YRDETQTFYFPALGGKKPDYVVSISASEQKT                            |
|                                                                    | HEKFSANQKFFNLQAKESNGLTDSAYNTGRYPGYT                        |
|                                                                    | KNKVDFTGYQQQLIAEGKATSADAVPGGETDYNL                         |
|                                                                    | EIPDIAKFYGTGTGSPVGGHYPLLNSVNINDTRVKG                       |
|                                                                    | YDINKKDMTIFLKDDK                                           |
|                                                                    | KAGDQWEKWSVKFA                                             |
|                                                                    | PSDWTLRLQSQQSFLTDADGEKLDG                                  |
|                                                                    | VWGQRAPILYSPAYGAPDLYSYKG                                   |
| >core/712/1/Org1_Gene1109<br>(serralysin family metalloprotease)   | GRGNRWINNKISYDAFEAGDYIARSNTGWNGVGVGTGQP                    |
|                                                                    | TWEGMYYNAGNTGLTGFDYQKD                                     |
|                                                                    | NITFKEVDAGRGEIYTNITFGYINDKYTQAYAWLPHTKNYFGDPYTDSRGFDVSGQS  |
|                                                                    | WYSSEPGALNVTPTGNY                                          |
|                                                                    | GLNHGPNYNAGEGRPSYKDADYAEDTRQY                              |
|                                                                    | SYWSEKITGADHKGYASAPLLDDITAIQKLYGANYNIRTDVTYGFDSNTGRD       |
|                                                                    | RYKQDQKISLREGDF                                            |
| >core/3310/1/Org1_Gene3165 (type 1 fimbrial protein)               | FATGLDSIDLQGLNQNSAGEKFIYFTDEFTGAAGA                        |
|                                                                    | TDVSVPLRDEGQGPADY                                          |
|                                                                    | CTVQPVKGGAADNLR                                            |
|                                                                    | VTFEGAEQDGRFQLTGSGK                                        |
|                                                                    | RNGNEAVPGKPLPPADIDLNNMA                                    |
|                                                                    | TNGFKGAHASFADMFAAGSGVGLGV                                  |
|                                                                    | VSQNFKDGAITRTD                                             |
| >core/760/4/Org4_Gene2156<br>(flagellar hook protein FlgE)         | AGQDAAGNVITQTGGIPQVLNIPTDMMMDARASAKGELTINLNSDDKVPSVSTFDPPN |
|                                                                    | PDSYNFSTMTTYDSQGNTHAV                                      |
|                                                                    | DGSDNTAVIQHLGNMEFDGNGKLLQMTAVDKNGLPIRDGGDPVLDPVTNQPVLDA    |
|                                                                    | NGNPVLDGGKPVLDKDGPNVLDAGGNPVLDGGKIEVKINNFNFDNGLNGANA       |
|                                                                    | GKTRQQKVTESSVSKIDVDGYQSGEYTSFK                             |
|                                                                    | NNGLASQGGNVWKATNASGNPMDGVPGTGQFG                           |
|                                                                    | PVSEKTSKLEKN                                               |

>core/2720/2/Org2\_Gene1342 (pilus periplasmic chaperone) LADKKQILHKSFMLQPK

**Table S3.** MHC-I and MHC-II epitopes predicted from B-cell epitopes. A percentile rank is the result of comparing given peptide's predicted binding affinity against set of similarly sized peptides selected randomly from the SWISS-PROT database. All the presented epitopes have lowest percentile score for a given B-cell epitope (cut-off < 100). Epitopes that are common in MHC-I and MHC-II were selected for further processing. .

| MHC-I      | Percentile Rank | MHC-II         | Percentile Rank |
|------------|-----------------|----------------|-----------------|
| RSDSRQLDSI | 2.6             | SRDSRQLDSI     | 33              |
| SRDSRQLDS  | 5.7             |                |                 |
| KSGFRNGSDH | 4               | KSGFRNGSDHDEN  | 36              |
| ILIDNTQTGL | 0.17            | GREILIDNTQTGL  | 0.34            |
| GREILIDNTQ | 7.1             |                |                 |
| RYGGWYDGK  | 2               | YQRYGGWYDGKG   | 5.6             |
| YQRYGGWYD  | 17              |                |                 |
| IDNTQTGLQY | 0.39            | IDNTQTGLQYSD   | 1.9             |
| TQTGLQYSD  | 20              |                |                 |
| AVLGKGTAAH | 0.95            | KDFAAVLGKGTAAH | 2.5             |
| KDFAAVLGK  | 1.2             |                |                 |
| DSDRIPGTRK | 0.89            | DKLDSDRIPGTRK  | 16              |
| DKLDSDRIP  | 30              |                |                 |
| SESDGKHGI  | 0.03            | NSESDGKHGIDL   | 5               |
| DGKHGIDL   | 24              |                |                 |
| NSDLLGQDL  | 0.84            | QYSNSDLLGQDL   | 18              |
| QYSNSDLLG  | 7.8             |                |                 |
| SSISASEQK  | 0.04            | DYVVSSISASEQK  | 1.5             |
| DYVVSSISA  | 6.2             |                |                 |
| YFPALGGK   | 0.79            | TFYFPALGGKKP   | 7               |
| TFYFPALG   | 3               |                |                 |
| YRDETQTFY  | 0.2             | YRDETQTFYFPA   | 16              |
| ETQTFYFPA  | 1.3             |                |                 |
| KFFNLQKAK  | 0.07            | QKFFNLQKAKESN  | 1.2             |
| NLQKAKESN  | 37              |                |                 |
| DSAYNTGRY  | 0.06            | DSAYNTGRYPGYT  | 36              |
| NTGRYPGYT  | 12              |                |                 |
| HEKFSANQKF | 0.03            | HEKFSANQKFFNL  | 2.4             |
| SANQKFFNL  | 0.03            |                |                 |
| LIAEGKATSA | 2.1             | QLIAEGKATSADA  | 2.4             |
| AEGKATSADA | 3.9             |                |                 |
| DAVPGGETDY | 0.08            | DAVPGGETDYNNL  | 38              |
| GGETDYNNL  | 14              |                |                 |
| KNKVDDFTGY | 0.35            | KNKVDDFTGYQQQ  | 24              |
| DDFTGYQQQ  | 7.9             |                |                 |
| YPLLNSVNI  | 0.02            | HYPLLNSVNINDT  | 2.6             |
| LLNSVNINDT | 8.4             |                |                 |
| GTYGSPVGG  | 2.7             | FYGTGTYGSPVGG  | 5.5             |
| FYGTGTYGS  | 6.8             |                |                 |
| EIPDIAKFY  | 0.01            | EIPDIAKFYGTGT  | 14              |
| DIAKFYGTGT | 8.2             |                |                 |
| DINKKDMTI  | 0.15            | DINKKDMTIFLKD  | 1.3             |
| KDMTIFLKD  | 19              |                |                 |
| QWEKWSVKF  | 0.12            | AGDQWEKWSVKFA  | 23              |
| AGDQWEKWSV | 12              |                |                 |
| TLRLQSQQSF | 0.14            | WTLRLQSQQSFL   | 0.09            |

|             |      |                 |      |
|-------------|------|-----------------|------|
| LQSQQSFSL   | 0.23 |                 |      |
| DADGEKLDG   | 20   | TDADGEKLDG      | 32   |
| TDADGEKLD   | 37   |                 |      |
| APILYSPAY   | 0.01 | QRAPILYSPAYGA   | 5.5  |
| QRAPILYSP   | 4.8  |                 |      |
| YGAPDLYSY   | 0.06 | PAYGAPDLYSYKG   | 20   |
| PAYGAPDLY   | 0.35 |                 |      |
| RWINNKISY   | 0.06 | GRWINNKISYDAF   | 2.3  |
| NNKISYDAF   | 1.8  |                 |      |
| NTGWNGVGV   | 0.29 | NTGWNGVGVGTGQP  | 13   |
| NGVGVTGQP   | 16   |                 |      |
| DAFEAGDYI   | 0.03 | DAFEAGDYIARSN   | 13   |
| AGDYIARSN   | 31   |                 |      |
| NTGLTGFNDY  | 0.46 | GNTGLTGFNDYQK   | 3.6  |
| LTGFNDYQK   | 0.89 |                 |      |
| GMYYNAGANT  | 6.7  | TWEGMYYNAGANT   | 19   |
| TWEGMYYNG   | 11   |                 |      |
| YSSEPGALNV  | 0.29 | GQSWYSSEPGALNVT | 0.64 |
| GQSWYSSEP   | 7.6  |                 |      |
| EIYTNITFGY  | 0.03 | RGEIYTNITFGYIN  | 2.1  |
| DPYTDSRGF   | 0.12 | YFGDPYTDSRGFDV  | 9    |
| YTDSRGFDV   | 0.21 |                 |      |
| TFKEVDAGR   | 0.02 | NITFKEVDAGRGEIY | 19   |
| EVDAGRGEIY  | 0.06 |                 |      |
| KYTQAYAWL   | 0.14 | DKYTQAYAWLPHTKN | 11   |
| AYAWLPHTKN  | 6.1  |                 |      |
| RPSYKDADY   | 0.32 | GRPSYKDADYAED   | 6.6  |
| SYKDADYAED  | 16   |                 |      |
| GLNHPGNYNA  | 1.4  | GLNHPGNYNAGE    | 31   |
| HPGNYNAGE   | 7.9  |                 |      |
| RTDDTVYGF   | 0.04 | YNIRTTDDTVYGFD  | 0.6  |
| YNIRTTDDTVY |      |                 |      |
| DITAIQKLY   | 0.05 | DDITAIQKLYGAN   | 4    |
| AIQKLYGAN   | 23   |                 |      |
| YWSEKITGA   | 1.7  | SYWSEKITGADHK   | 18   |
| SEKITGADHK  | 2.9  |                 |      |
| KQDQKISLR   | 0.14 | RYKQDQKISLREGD  | 7.9  |
| QKISLREGD   | 37   |                 |      |
| KFIYFTDEF   | 0.07 | GEKFIYFTDEFT    | 0.09 |
| GEKFIYFTD   | 7.2  |                 |      |
| FTDEFTGAA   | 0.41 | IYFTDEFTGAAGA   | 9    |
| DEFTGAAGA   | 2.3  |                 |      |
| GLDSIDLQGL  | 0.35 | FATGLDSIDLQGL   | 12   |
| FATGLDSIDL  | 6.5  |                 |      |
| QLRDEGQGA   | 2.7  | SVPQLRDEGQGA    | 30   |
| SVPQLRDEGQ  | 15   |                 |      |
| TDVSVPLR    | 1.1  | TDVSVPLRDEGQ    | 46   |
| VPQLRDEGQ   | 7.4  |                 |      |
| TVQPVKGGA   | 1.1  | TVQPVKGGAADNLR  | 6.9  |
| KGGAADNLR   | 2.7  |                 |      |
| FEGAEQDGRF  | 0.92 | VTFEGAEQDGRFQ   | 17   |
| VTFEGAEQDG  | 6.5  |                 |      |
| RFQLTGSGK   | 0.49 | EQDGRFQLTGSGK   | 54   |
| EQDGRFQLT   | 5.9  |                 |      |
| PPADIDLNNM  | 1.6  | PLPPADIDLNNMA   | 18   |
| PLPPADIDL   | 5.3  |                 |      |
| NEAVPGKPL   | 0.11 | RNGNEAVPGKPL    | 21   |

|            |       |                 |      |
|------------|-------|-----------------|------|
| GFKGAHASF  | 0.27  | TNGFKGAHASFAD   | 0.59 |
| KGAHASFAD  | 37    |                 |      |
| FAGSGVGLGV | 0.98  | DMFAGSGVGLGV    | 1.4  |
| NFKDGAITR  | 0.01  | VSQNFKDGAITRTD  | 18   |
| VSQNFKDGA  | 9.5   |                 |      |
| IQTGGIPQV  | 0.02  | NVTIQTGGIPQVLN  | 1.8  |
| NVTIQTGGI  | 1.6   |                 |      |
| NSDDKVPSV  | 0.12  | LTINLNSDDKVPSV  | 2.4  |
| LTINLNSDDK | 2     |                 |      |
| DSYNFSTTM  | 0.13  | DSYNFSTTMTTYD   | 1.7  |
| NFSTTMTTYD | 16    |                 |      |
| MMDARASAK  | 0.4   | IPTDMMDARASAKGE | 15   |
| DARASAKGE  | 18    |                 |      |
| DAAGNVTIQT | 1.2   | AGQDAAGNVTIQTGG | 14.8 |
| AGQDAAGNV  | 11    |                 |      |
| VLDANGNPVL | 0.4   | NQPVLDANGNPVLD  | 0.93 |
| DANGNPVLD  | 11    |                 |      |
| NFNFDNGL   | 2.1   | NFNFDNGLNGANA   | 3.7  |
| DFNGLNGANA | 16    |                 |      |
| DGSDNTAVI  | 0.26  | DGSDNTAVIQHLGN  | 3.2  |
| NTAVIQHLGN | 20    |                 |      |
| MEFDGNGKL  | 0.01  | GNMEFDGNGKLLQM  | 4    |
| DGNGKLLQM  | 0.22  |                 |      |
| VLDKDGPNVL | 0.19  | KPVLDKDGPNVLDA  | 12   |
| KPVLDKDGPN | 11    |                 |      |
| VLDGGKIEV  | 0.26  | GGNPVLDGGKIEV   | 12   |
| GGNPVLDGGK | 2.8   |                 |      |
| MTAVDKNGL  | 0.3   | QMTAVDKNGLPIRDG | 22   |
| AVDKNGLPIR | 0.72  |                 |      |
| KVTESSVSK  | 0.01  | RQQKVTESSVSKI   | 7.6  |
| RQQKVTESSV | 1.7   |                 |      |
| YQSGEYTSF  | 0.01  | VDGYQSGEYTSFK   | 14   |
| VDGYQSGEY  | 0.095 |                 |      |
| NVWKATNAS  | 3.6   | GGNVWKATNASGN   | 5.9  |
| GGNVWKATNA | 29    |                 |      |
| LASQGGNVW  | 0.04  | NNGLASQGGNVWK   | 19   |
| ASQGGNVWK  | 0.11  |                 |      |
| DGVPGTGQF  | 0.6   | PMDGVPGTGQFG    | 17   |
| PMDGVPGTGQ | 19    |                 |      |
| PVSEKTSLK  | 1.1   | PVSEKTSLKEK     | 20   |
| VSEKTSLKEK | 0.96  |                 |      |
| KQILHKSFM  | 0.19  | KKQILHKSFMLQP   | 2.4  |
| ILHKSFMLQP | 6.1   |                 |      |
| KQILHKSFM  | 0.19  | LADKKQILHKSFM   | 19   |
| LADKKQILH  | 0.41  |                 |      |

**Table S4.** Refinement models of loop model vaccine structure. The model selectin was based on overall lowest GDT-HA (global distance test - high accuracy) score, lowest RMSD (root mean square deviation) score, lowest MolProbity score, lowest clash score, less number of poor rotamers value, and highest number of residues in Ramachandran favored regions of the Ramachandran plot. For each parameter, there is not specific threshold value.

| Model   | GDT-HA<br>(global distance<br>test - high<br>accuracy) | RMSD<br>(root mean<br>square<br>deviation) | MolProbity | Clash score | Poor<br>rotamers | Rama favored |
|---------|--------------------------------------------------------|--------------------------------------------|------------|-------------|------------------|--------------|
| Initial | 1.0000                                                 | 0.000                                      | 3.577      | 77.8        | 5.0              | 83.5         |
| MODEL 1 | 0.9382                                                 | 0.438                                      | 2.044      | 10.4        | 0.4              | 91.3         |
| MODEL 2 | 0.9404                                                 | 0.432                                      | 2.143      | 10.8        | 1.2              | 90.2         |
| MODEL 3 | 0.9382                                                 | 0.439                                      | 2.141      | 11.2        | 1.2              | 90.8         |
| MODEL 4 | 0.9425                                                 | 0.419                                      | 2.062      | 10.4        | 0.4              | 90.8         |
| MODEL 5 | 0.9361                                                 | 0.430                                      | 2.153      | 13.4        | 0.8              | 91.0         |

**Table S5.** Docking score of top 20 complexes of designed vaccine construct to MHC-I/MHC-II/TLR-4 generated by PATCHDOCK server. The complexes are ranked on PATCHDOCK score. Higher score implies best docked complex and vice versa. Energy is presented in kJ.mol<sup>-1</sup> (lower energy solution is often regarded as best docked complex). ACE stands for atomic energy contact.

| MHC-I       |       |        |         |                |       |       |        |               |
|-------------|-------|--------|---------|----------------|-------|-------|--------|---------------|
| Solution No | Score | Area   | ACE     | Transformation |       |       |        |               |
| 1           | 23218 | 3009.1 | 465.06  | 0.44           | -0.95 | 1.46  | 43.02  | -13.14 78.50  |
| 2           | 18978 | 3101.5 | 230.84  | -1.37          | 0.08  | -2.71 | 53.02  | 89.62 52.24   |
| 3           | 18706 | 3368.8 | -107.69 | 2.21           | -0.62 | 1.38  | 13.35  | -32.72 57.49  |
| 4           | 18648 | 2944.5 | 334.32  | 0.54           | -1.02 | 1.65  | 46.61  | -9.51 79.27   |
| 5           | 18640 | 3082.1 | 324.04  | 2.51           | -0.80 | 0.34  | -12.67 | 51.09 53.44   |
| 6           | 17684 | 2360.5 | 90.47   | 1.73           | 1.06  | -1.80 | 36.58  | 25.65 -59.57  |
| 7           | 17570 | 3525.5 | 167.11  | -3.06          | -0.97 | -2.12 | 38.66  | 7.50 71.55    |
| 8           | 17532 | 2485.5 | 373.21  | 0.75           | -0.06 | 1.70  | 40.12  | -41.26 17.07  |
| 9           | 17450 | 2451.5 | 250.30  | 1.06           | 0.60  | -2.09 | 33.09  | 21.11 33.22   |
| 10          | 17120 | 2631.4 | 272.13  | -2.59          | 1.43  | 1.14  | -17.50 | 7.30 -21.94   |
| 11          | 16802 | 3212   | 125.46  | 1.97           | -0.53 | -2.37 | 59.84  | 17.11 48.28   |
| 12          | 16680 | 2635.7 | 305.90  | -0.94          | 0.30  | -0.58 | -17.84 | 43.31 48.72   |
| 13          | 16636 | 2586.4 | 166.70  | 0.92           | -0.55 | 1.32  | 14.27  | -48.26 46.60  |
| 14          | 16600 | 2933.9 | 247.26  | -1.47          | 0.09  | -1.88 | 22.10  | 67.35 73.26   |
| 15          | 16530 | 3004.8 | 434.78  | 0.56           | 0.76  | 2.07  | 71.96  | 9.79 -16.50   |
| 16          | 16510 | 2735.1 | 192.63  | -2.57          | -0.12 | -3.13 | 62.14  | 33.56 78.65   |
| 17          | 16494 | 2177   | 372.28  | -0.02          | -0.10 | 1.32  | 83.70  | 1.11 13.63    |
| 18          | 16468 | 3433.5 | 269.82  | -3.07          | 0.16  | 1.31  | 11.53  | -30.18 42.98  |
| 19          | 16458 | 3140.2 | 166.73  | 1.28           | 0.70  | -2.09 | 32.90  | 21.63 31.35   |
| 20          | 16416 | 2023.6 | 180.05  | 0.84           | -0.20 | 1.93  | 48.51  | -42.11 27.38  |
| MHC-II      |       |        |         |                |       |       |        |               |
| 1           | 20404 | 4090.1 | 477.14  | 0.15           | -0.52 | 1.00  | 81.45  | 45.51 24.32   |
| 2           | 20344 | 3191.4 | 439.17  | -0.71          | 0.45  | 1.26  | 112.26 | 12.36 -31.17  |
| 3           | 19444 | 2465.7 | 383.64  | -0.03          | -1.00 | -2.64 | 137.01 | 97.56 50.09   |
| 4           | 19402 | 3316.9 | 382.27  | 2.00           | -1.05 | -0.73 | 89.18  | 102.16 51.10  |
| 5           | 19222 | 3302.5 | 214.65  | -0.47          | -0.43 | 2.99  | 161.92 | 84.09 31.52   |
| 6           | 19098 | 2926.1 | 37.77   | 0.83           | -0.07 | -2.30 | 120.30 | 148.88 -14.85 |
| 7           | 18854 | 3232   | 9.62    | 1.85           | -1.46 | -0.87 | 107.61 | 128.17 30.73  |
| 8           | 18818 | 2676   | 306.84  | -0.04          | -0.81 | -2.52 | 136.56 | 105.19 41.08  |
| 9           | 18628 | 2561.5 | -36.92  | 1.03           | -0.17 | -2.37 | 129.58 | 143.61 -8.50  |
| 10          | 18598 | 3118.3 | 363.85  | 1.16           | 0.03  | -3.03 | 148.22 | 105.72 -19.46 |
| 11          | 18578 | 3450.3 | 73.18   | -0.11          | 0.29  | 1.52  | 120.44 | 9.81 -23.12   |
| 12          | 18354 | 3347.8 | 101.28  | -2.07          | -0.59 | -0.50 | 71.71  | 118.03 64.28  |
| 13          | 18322 | 2639.5 | 36.39   | 2.88           | -0.44 | -2.63 | 163.15 | 80.36 19.08   |

|              |       |        |         |                                       |
|--------------|-------|--------|---------|---------------------------------------|
| 14           | 18258 | 2870   | -48.01  | 0.01 -0.13 -2.23 95.52 125.33 -17.84  |
| 15           | 18176 | 3291.2 | 216.59  | -3.07 0.07 -0.32 60.23 91.40 7.98     |
| 16           | 18084 | 2613.9 | 408.25  | -0.64 -0.01 1.56 171.65 17.68 14.38   |
| 17           | 18066 | 4546.5 | 125.57  | 1.46 0.14 -3.12 143.57 94.62 -25.23   |
| 18           | 18020 | 2724   | 132.69  | -1.88 -0.15 -2.70 121.44 117.84 61.88 |
| 19           | 17930 | 3178   | -349.81 | -2.29 -0.83 -1.26 89.60 118.50 67.08  |
| 20           | 17652 | 3903.2 | 130.77  | 2.43 0.42 0.27 78.47 96.35 2.51       |
| <b>TLR-4</b> |       |        |         |                                       |
| 1            | 23368 | 3348.5 | 124.82  | -2.14 0.78 2.37 37.00 -38.54 -81.88   |
| 2            | 23366 | 3692.7 | 494.34  | 1.51 1.04 0.45 -41.78 54.41 -73.77    |
| 3            | 23290 | 3830.8 | 304.96  | 0.42 -0.02 0.33 -83.82 -7.61 -63.77   |
| 4            | 21380 | 3401.5 | 238.73  | -1.10 -0.92 -3.00 -33.71 -3.72 38.52  |
| 5            | 20228 | 3114   | 177.99  | -1.01 -1.11 3.13 -41.42 -4.11 39.98   |
| 6            | 20118 | 3332.3 | 356.97  | 0.47 -1.41 1.41 -17.16 -27.52 44.28   |
| 7            | 20044 | 2647   | 468.68  | 0.12 -0.01 -2.60 -20.74 40.81 -78.21  |
| 8            | 19988 | 3930   | 161.43  | 1.34 0.79 0.63 0.92 -30.97 -91.43     |
| 9            | 19700 | 3524.6 | 240.39  | -0.59 -0.97 -2.49 -9.37 70.32 -27.33  |
| 10           | 19494 | 3664.9 | 274.65  | 1.64 0.20 1.14 -70.54 -68.79 -59.19   |
| 11           | 19268 | 2822.8 | 436.04  | -2.24 0.28 -2.46 -17.97 55.32 -14.49  |
| 12           | 19188 | 2590.1 | 359.84  | 1.90 -1.02 1.74 -3.21 -45.72 22.44    |
| 13           | 19168 | 2323.3 | 470.17  | 0.66 0.78 1.58 -44.59 -4.11 -14.81    |
| 14           | 19094 | 3164.6 | 451.97  | 1.35 0.80 1.56 21.63 -36.34 -91.73    |
| 15           | 19082 | 3035.8 | 216.39  | 0.48 -1.28 1.18 -27.96 -35.83 41.00   |
| 16           | 19068 | 2711.3 | 294.84  | 1.33 0.95 0.73 8.73 -28.81 -93.93     |
| 17           | 19018 | 2631.1 | 76.78   | -3.13 0.62 2.21 17.35 -59.05 -77.81   |
| 18           | 19004 | 3063   | 441.00  | 1.39 0.77 1.07 -37.96 -40.62 -91.78   |
| 19           | 18988 | 3564.9 | -71.56  | 0.08 -1.04 0.37 -66.08 -21.77 33.79   |
| 20           | 18964 | 3261.3 | 436.62  | -0.63 -1.30 -1.95 8.56 2.07 23.40     |
